# Supplementary material for: An intracellular protein delivery platform based on glutathione-responsive protein nanocapsules
Source: Royal Society of Chemistry journal article supplement (doi:10.1039/c6cc05099a), 2016-01-01
Supplement: c6cc05099a1.pdf [file c6cc05099a1.pdf]

## SUPPLEMENTARY INFORMATION

### *Materials*

Polyallylamine hydrochloride (PAH,  $M_w$  17500), poly(ethylene glycol) 2000 methyl ether (MPEG2000), succinic anhydride, N-hydroxysuccinimide, triethylamine, succinic acid bis(N-hydroxysuccinimide ester), boric acid, sodium tetraborate, Sephadex G-75, Trizma® base, sodium phosphate monobasic monohydrate, sodium phosphate dibasic, Dulbecco's modified Eagle's medium (DMEM), resazurin, bicinchoninic acid (BCA), tartaric acid,  $\text{CuSO}_4$ , 3,3',5,5'-tetramethylbenzidine, glucose, ethanol, uric acid, 30% hydrogen peroxide solution, glucose oxidase (GOX) from *Aspergillus niger*, Catalase (Cat) from bovine liver, horseradish peroxidase (HRP), alcohol oxidase (AOX) from *Pichia Pastoris* were purchased from Sigma-Aldrich and were used as received. Traut's reagent (2-thiolanimine hydrochloride), was purchased from MP Biomedicals™, fetal bovine serum (FBS) were purchased from Corning™. Active recombinant human Caspase 3 (Cas3) and FITC annexin V apoptosis detection kit were purchased from BD Biosciences. Urate oxidase (UOX) is a kind gift from Dr. Jianmin Li from Beijing Institute of Biotechnology.

### *Instruments*

TEM images were obtained on a Philips EM-120 TEM instrument. Particle size and zeta potential were measured with Zetasizer Nano-ZS (Malvern Instruments Ltd., UK). NMR spectrum was conducted on AV400 NMR spectrometer from Bruke Corporation. UV-Visible absorption was acquired with a Beckman Coulter DU®730 UV/Vis spectrophotometer. Fluorescence intensities were measured with a Tecan GENios multifunction microplate reader. Fluorescence images were obtained on a Carl Zeiss Axio Observer inverted fluorescence microscope. Flow cytometry analysis was achieved using a BD LSRFortessa cell analyzer.

## ***Experimental***

*Synthesis of the self-crosslinkable polymer vectors:* Activation of Poly(ethylene glycol) 2000 methyl ether (MPEG-2000) was done by first converting it to PEG-succinate then to N-hydroxysuccinimide ester as described elsewhere<sup>21</sup>. The resulted PEG-succinate NHS ester was further reacted with polyallylamine hydrochloride (PAH, Sigma Aldrich, Mw 15000) at different PEG/PAH molar ratio in methanol using triethylamine as acid binding reagent. The successful synthesis of PEGylated PAH was verified by <sup>1</sup>HNMR spectrum (Fig. S1). The PEGylated PAH was dialyzed against deionized water to remove by products and then lyophilized. For the synthesis of the self-crosslinkable polymer vectors, PEGylated PAH was dissolved in borate buffer (pH 8.0) with 10 mM EDTA and reacted with 2-iminothiolane hydrochloride at 2-iminothiolane hydrochloride to PAH side chain amine molar ratio of 1 : 1.

*Thiol groups quantification:* Quantification of thiol groups on the self-crosslinkable polymer vector was achieved using Ellman's assay. Briefly, 10  $\mu$ L of sample solutions were added to 990  $\mu$ L of DTNB solution in Tris buffer (0.1M, pH 8.0) with a final DTNB concentration of 0.2 mM. The mixed solution was incubated at room temperature for 5 minutes in a quartz cuvette and the absorbance was measured at 412 nm under room temperature. The molarity of thiol groups in the assay was found by dividing the absorbance by  $13600 \text{ M}^{-1} \text{ cm}^{-1}$ . The typical amount of thiol groups conjugated to the PAH was 17% of total amine groups in PAH, which was quantified with Ellman's assay using cysteine to make standard curve (See Fig. S5).

*Preparation of the protein nanocapsules:* Negatively charged protein, including BSA, GOX, HRP, EGFP, AOX, UOX and Cas3 were mixed with the polymer vector at polymer/protein molar ratio of 1:20 to form the protein/polymer assemblies, followed by air-bubbling into the solution to crosslink the polymer vectors. The resulted nanocapsules were dialyzed against 10 mM phosphate buffer (pH 7.0) and further purified with Sephadex G-75 to remove excess polymer vectors and proteins. To

create nondegradable nCas3, Cas 3 was mixed with PEG conjugated PAH without thiolation. The Cas3/polymer assembly was further crosslinked by succinic acid bis(N-hydroxysuccinimide ester) at succinic acid bis(N-hydroxysuccinimide ester) to PAH side chain amine molar ratio of 0.1 : 1, which forms more stable amide bonds.

*BCA protein content quantification:* All the protein content in solution was determined by bicinchoninic acid (BCA) colorimetric protein assay. Briefly, a tartrate buffer (pH 11.25) containing 25 mM BCA, 3.2 mM CuSO<sub>4</sub>, and appropriately diluted protein or nanocapsules was incubated at 60 °C for 30min. After the solution was cooled to room temperature, absorbance reading at 562 nm was determined with a UV-Vis spectrometer. GOX, HRP, Cat, UOX and AOX solutions with known concentration were used as standards.

*HRP activity assay:* H<sub>2</sub>O<sub>2</sub> and 3,3',5,5'-tetramethylbenzidine were dissolved in sodium acetate buffer (50mM, pH 5.1) at a final concentration of 10 mM and 0.5 mM, respectively. Native HRP and nHRP were then added to the assay solutions, respectively. The mixture was placed in a quartz cuvette and the absorbance change at 655 nm was monitored with a UV-Vis spectrometer under room temperature.

*GOX activity assay:* Glucose, 3,3',5,5'-tetramethylbenzidine and HRP were dissolved in sodium acetate buffer (50mM, pH 5.1) at a final concentration of 90 mM, 0.5 mM and 0.01mg/ml, respectively. Native GOX and nGOX were added to the assay solutions. The mixture was placed in a quartz cuvette and the absorbance change at 655 nm was monitored with a UV-Vis spectrometer under room temperature.

*Cat activity assay:* H<sub>2</sub>O<sub>2</sub> was dissolved in phosphate buffer (20mM, pH 7.0) at a final concentration of 10 mM. The native Cat and nCat were added to the assay solution, respectively. The mixture was placed in a quartz cuvette and the absorbance change at 240 nm was monitored with a UV-Vis spectrometer under room temperature.

*UOX activity assay:* Uric acid was dissolved in borate buffer (100mM, pH 8.5) at a final concentration of 0.12 mM. Native UOX and nUOX were added to the assay solutions, respectively. The mixture was placed in a quartz cuvette and the absorbance change at 290 nm was monitored with a UV-Vis spectrometer under room temperature.

*AOX activity assay:* Ethanol, 3,3',5,5'-tetramethylbenzidine and HRP were dissolved in phosphate buffer (20mM, pH 6.0) at a final concentration of 20 mM, 0.5 mM and 0.01mg/ml, respectively. Native AOX and nAOX were added to the assay solutions, respectively. The mixture was placed in a quartz cuvette and the absorbance change at 655 nm was monitored with a UV-Vis spectrometer under room temperature.

*Stability evaluation of nCat:* The stability of native Cat and nCat against proteolysis were evaluated by challenging with 0.5 mg/mL trypsin and incubating in Tris-HCl buffer with 10 mM CaCl<sub>2</sub> at 37°C. The activity of native Cat and nCat were measured every 20 min with the Cat activity assay described above.

*Stability evaluation of nGOX:* The stability of native GOX and nGOX against proteolysis were evaluated by challenging with 0.5 mg/mL pepsin and incubating in pH 2.7 glycine-HCl buffer at 37°C. The activity of native GOX and nGOX were measured every 30 min with the GOX activity assay described above.

*Cell proliferation assay:* The toxicity of the BSA nanocapsules was assessed by the resazurin assay using native BSA as control. HeLa cells (10000 cells/well) were seeded on a 96-well plate in 100  $\mu$ L Dulbecco's modified Eagle's medium (DMEM) supplemented with 10% fetal bovine serum (FBS) and 1% penicillin/streptomycin (P/S) the day before exposure to BSA nanocapsules. After incubation with nanocapsules at different concentrations for 24 hours, the cells were washed with PBS and incubated with 100  $\mu$ L fresh medium containing resazurin (10  $\mu$ L 0.1mg/mL in

PBS) for 3 h. The cell viability was then determined by measuring the fluorescence intensity of each well ( $E_x = 550$  nm,  $E_m = 595$  nm) by using a microplate reader. Untreated cells and fresh medium were used as controls for 100% and 0% cell proliferation, respectively.

*Cell internalization studies:* Studies of intracellular delivery with the protein nanocapsules were achieved using fluorescence microscopic technique and fluorescence-activated cell sorting (FACS). HeLa cells were cultured in DMEM supplemented with 10% FBS and 1% P/S. Cells (50000 cells/well, 24-well plate) were seeded the day before exposing to samples. Nanocapsules or native proteins with different concentrations were added into the cell cultures. After incubation at 37 °C for 4 hours, the cells were washed three times with PBS and either visualized with a fluorescent microscope or analyzed via FACS.

*Cell Apoptosis Assay:* HeLa cells (50000 cells/well, 24-well plate) were seeded the day before adding samples. Native Cas3, nCas3, and nBSA were incubated with HeLa cells at 37°C for 48 hours, respectively. Cas3 delivery were analyzed by measuring the percentage of cells that underwent apoptosis by staining cells with FITC-annexin V apoptosis detection kit and analyzing using FACS.

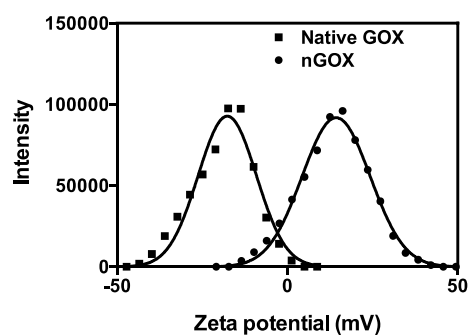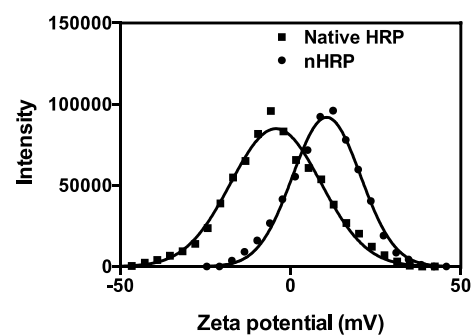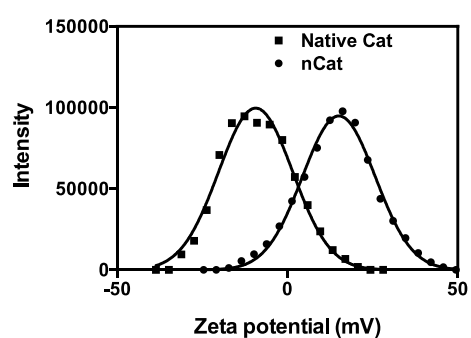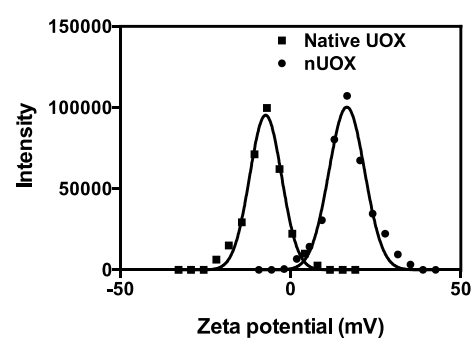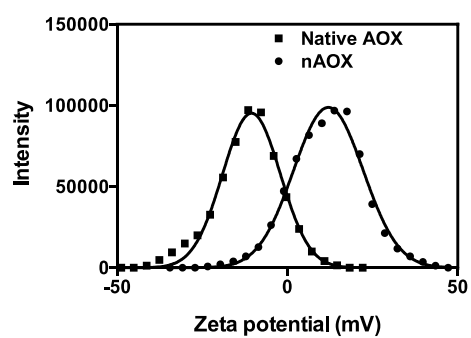

**Fig. S1** Zeta potential of GOX, HRP, Cat, UOX, AOX and their nanocapsules counterparts.

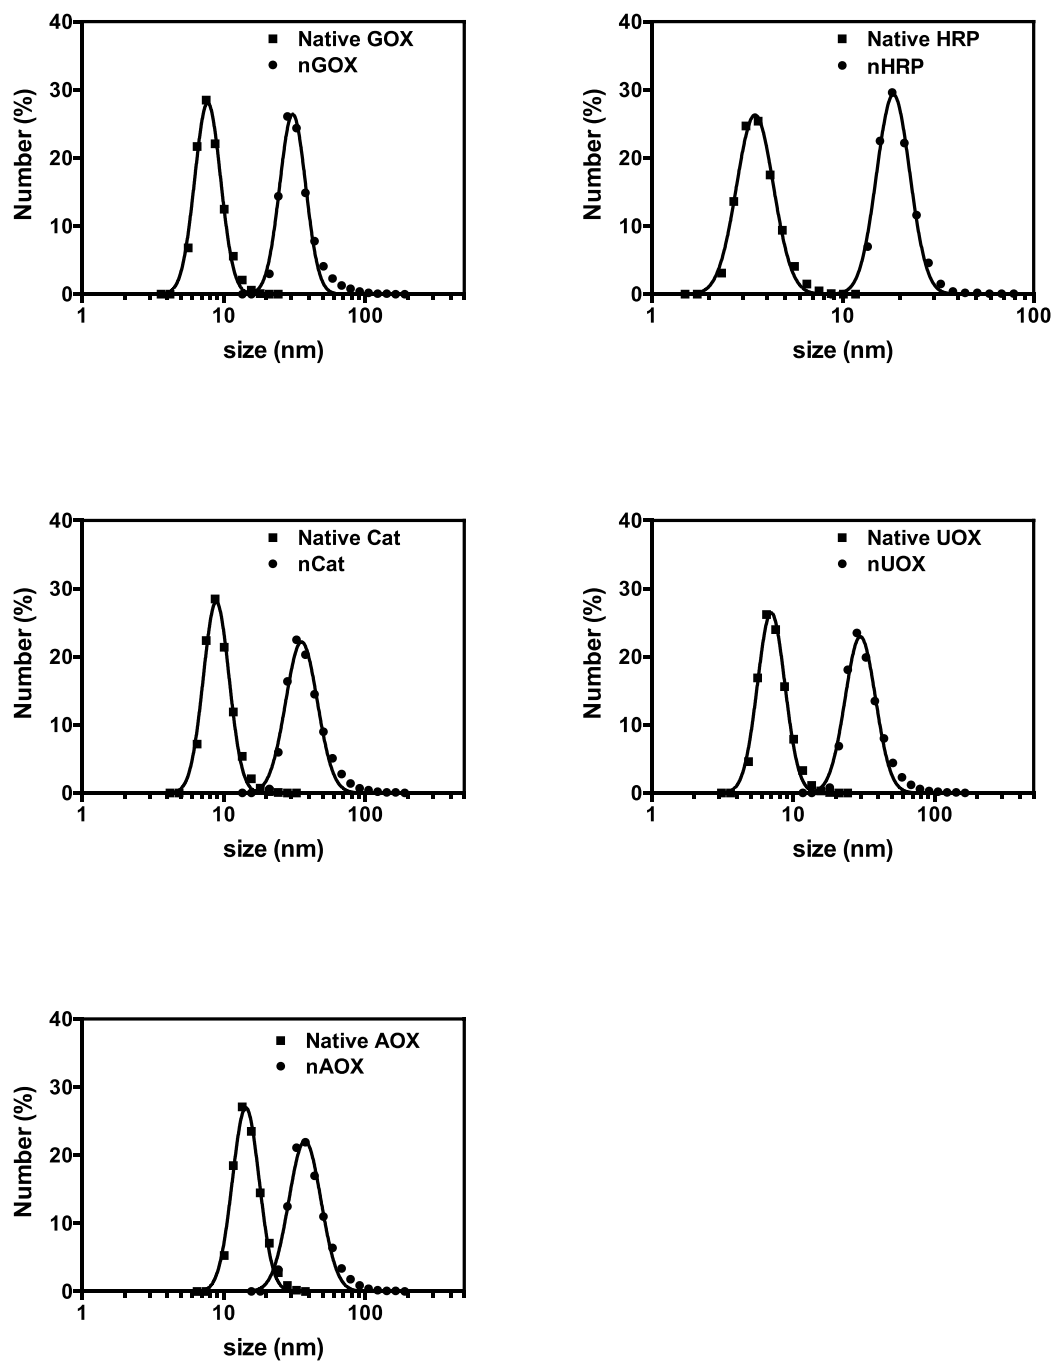

**Fig. S2** Size distribution of GOX, HRP, Cat, UOX, AOX and their nanocapsules counterparts.

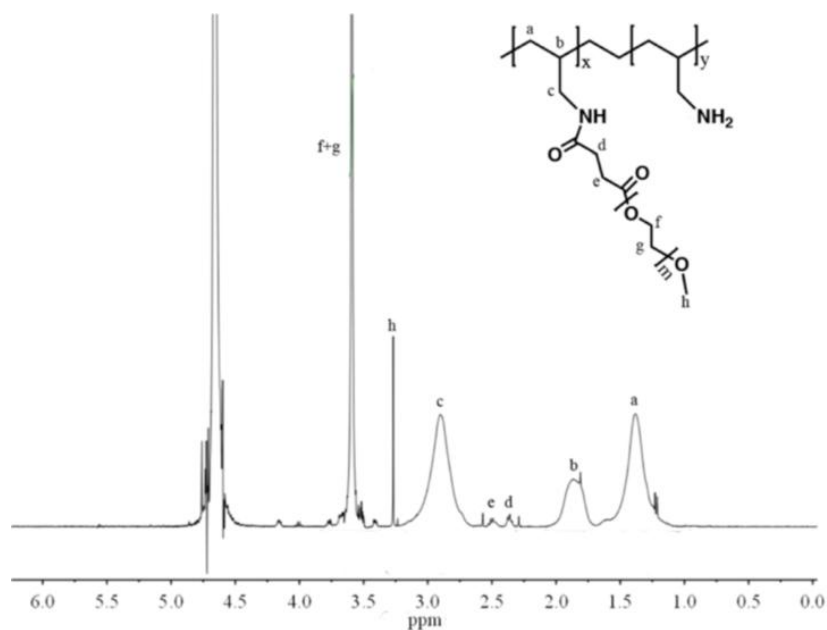

**Fig. S3** <sup>1</sup>H NMR spectrum of PEGylated PAH at PEG/PAH molar ratio of 4.

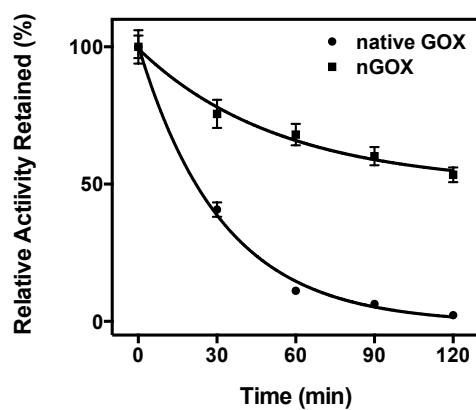

**Fig. S4** Relative activities of native GOX and nGOX after exposure to 0.5 mg/ml pepsin in Glycine-HCl buffer at pH 2.7 at 37°C.

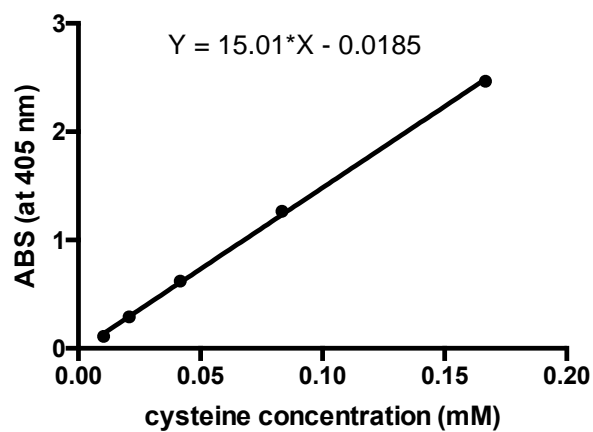

**Fig. S5** Standard curve for Ellman's assay using cysteine as standard.

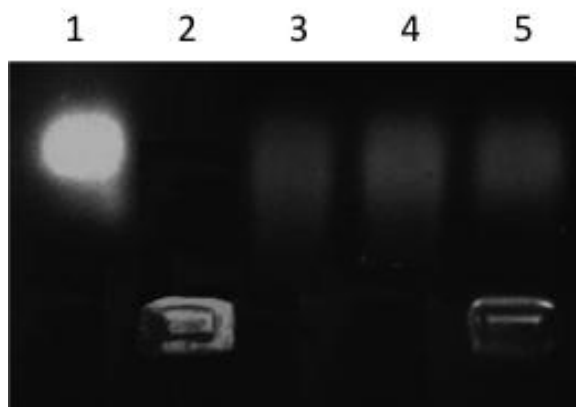

**Fig. S6** Agarose gel analysis of nBSA under different GSH concentration 1) native BSA, 2) nBSA with 10 mg/ml heparin only, 3) nBSA with 10 mg/ml heparin and 20 mM GSH, 4) nBSA with 10 mg/ml heparin and 10 mM GSH, 5) nBSA with 10 mg/ml heparin and 5 mM GSH.

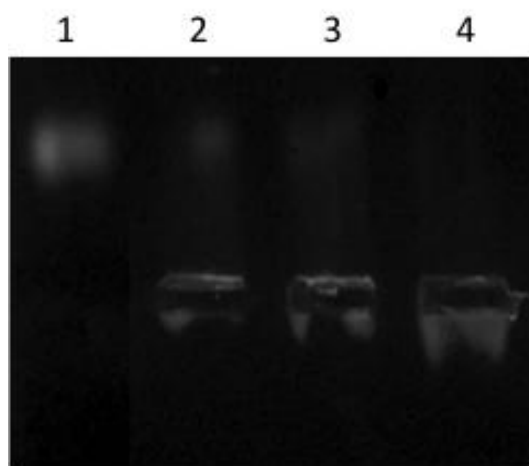

**Fig. S7** Agarose gel analysis of nBSA with different PAH to BSA ratios 1) native BSA, 2) PAH/BSA molar ratio is 2, 3) PAH/BSA molar ratio is 4, 4) PAH/BSA molar ratio is 8.

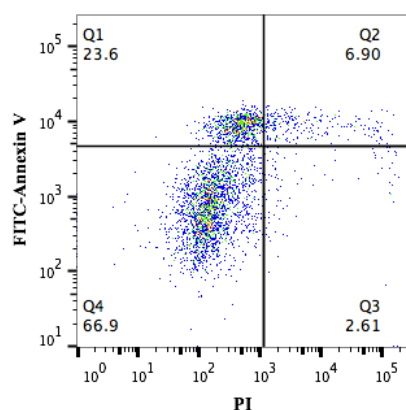

**Fig. S8** Flow cytometry analysis of cell apoptosis of cells treated with 5  $\mu$ g/ml nondegradable nCas3.
